# Supplementary material for: Identification of the centrosomal maturation factor SSX2IP as a Wtip-binding partner by targeted proximity biotinylation
Source: PubMed Central journal article supplement (PMC8553094; doi:10.1371/journal.pone.0259068), 2021-10-28

**Supporting information: S1 Fig and full gel images.**

**S1 Fig. Colocalization of SSX2IP and WtipN in ectoderm cells.**

A, Experimental scheme. RFP-WtipN RNA (300 pg) and GFP-XSSX2IP RNA (300 pg) were coinjected into four-cell embryos. When the embryos reached stage 12.5, they were fixed, and the ectodermal tissue was imaged. B, GFP-SSX2IP localization in ectoderm cells. SSX2IP colocalizes with WtipN in cytoplasmic puncta. C, RFPWtipN localization at the junctions and cytoplasmic puncta. D-D', Coexpression of both proteins revealed mixed cytoplasmic aggregates (arrow). Scale bar, 15  $\mu$ m. Data are representative of 3 independent experiments.

**Fig S1**

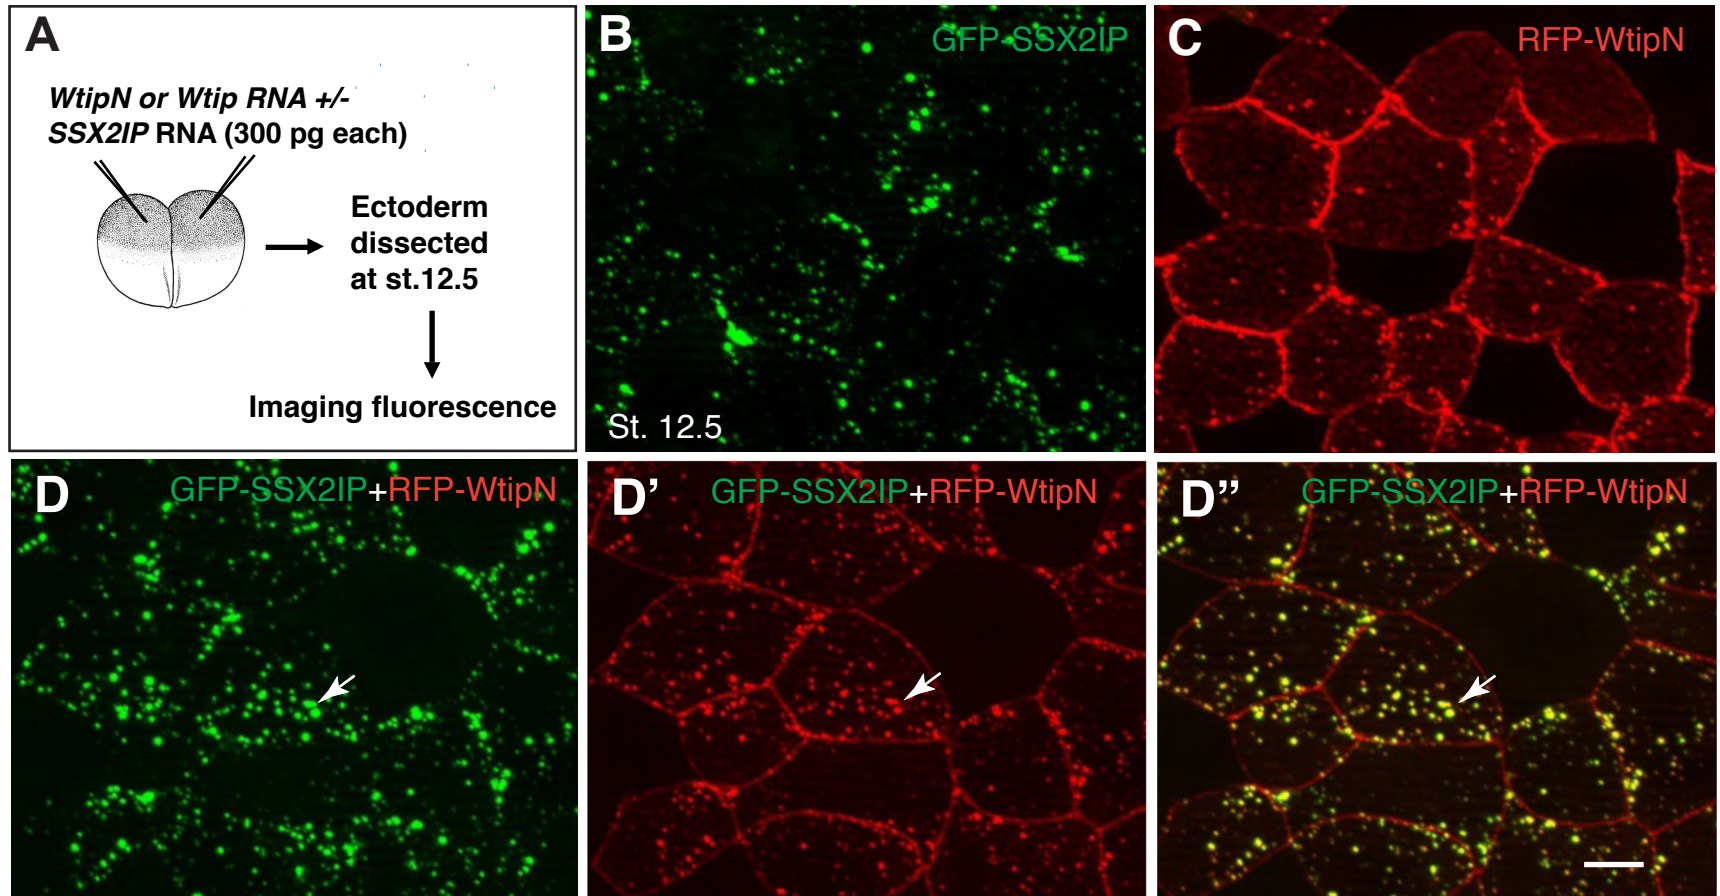

Supplement: pone.0259068.s001.pdf [file pone.0259068.s001.pdf]
