# Supplementary material for: Identification of the centrosomal maturation factor SSX2IP as a Wtip-binding partner by targeted proximity biotinylation
Source: PubMed Central journal article supplement (PMC8553094; doi:10.1371/journal.pone.0259068), 2021-10-28

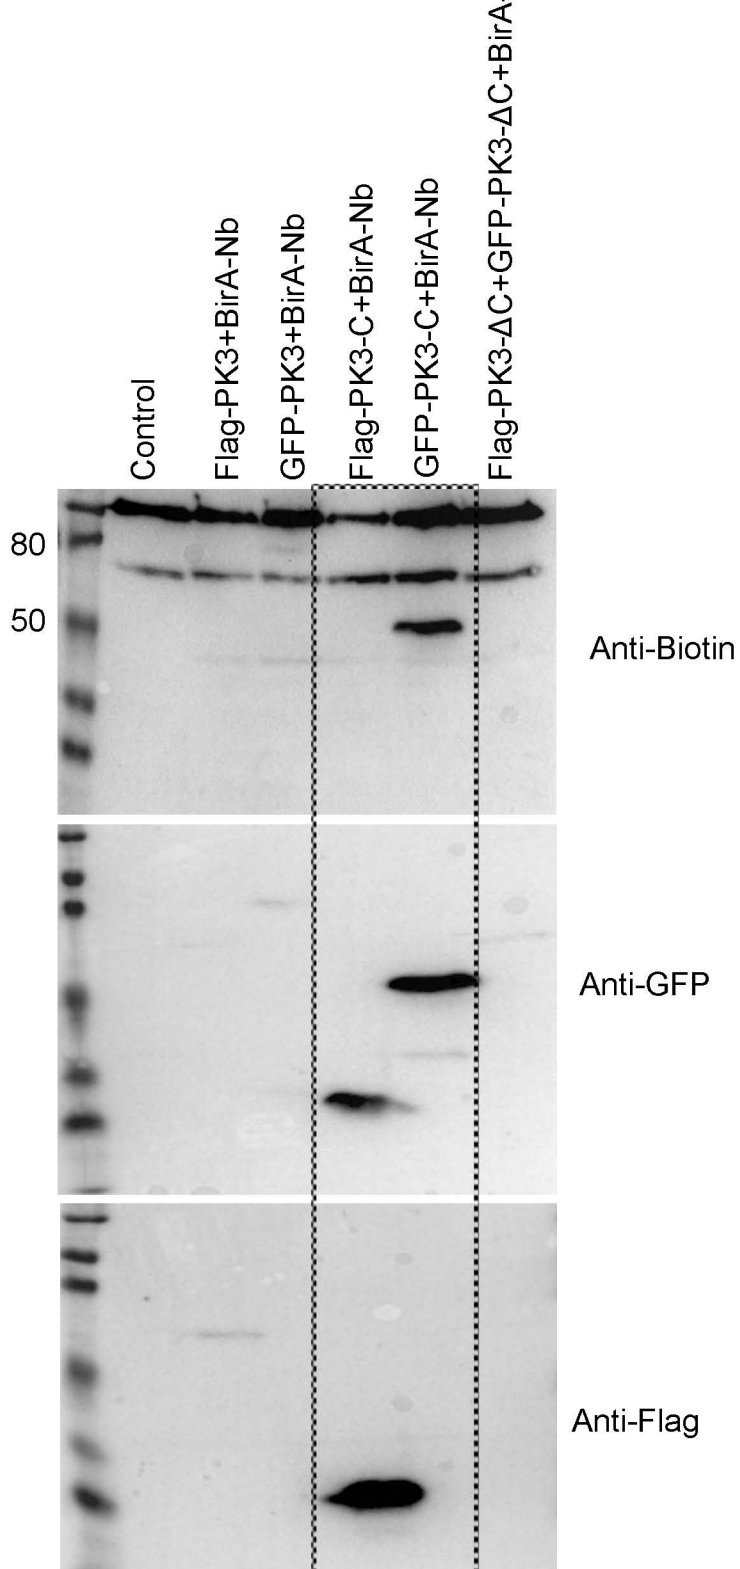

|                     |                    |                 |                     |                    |           |                     |
|---------------------|--------------------|-----------------|---------------------|--------------------|-----------|---------------------|
| Flag-WTIP-N+BirA-Nb | GFP-WTIP-N+BirA-Nb | BirA-WTIP-Nterm | Flag-WTIP-N+BirA-Nb | GFP-WTIP-N+BirA-Nb | BirA-WTIP | Flag-WTIP-N+BirA-Nb |
| input               |                    |                 | pulldown            |                    |           |                     |
|                     |                    |                 | 1.5μL               |                    |           |                     |

Figure 3B

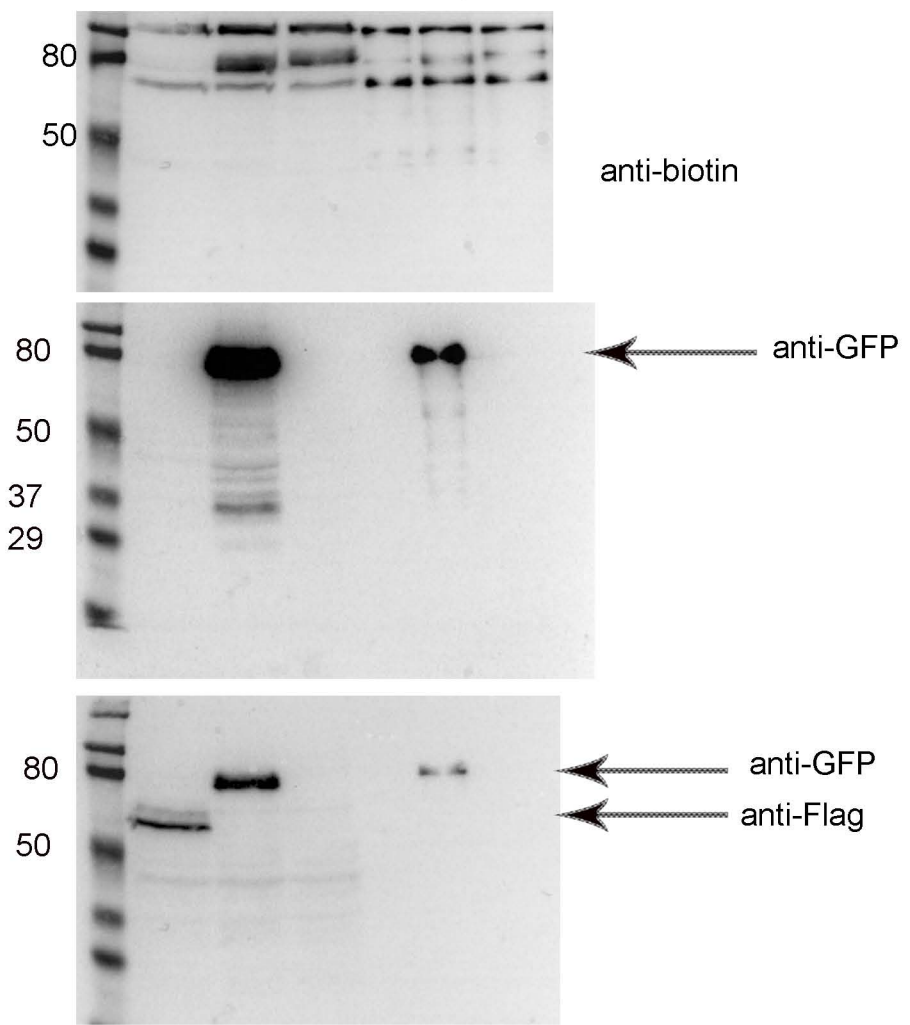

# Fig. 4, Raw whole blots

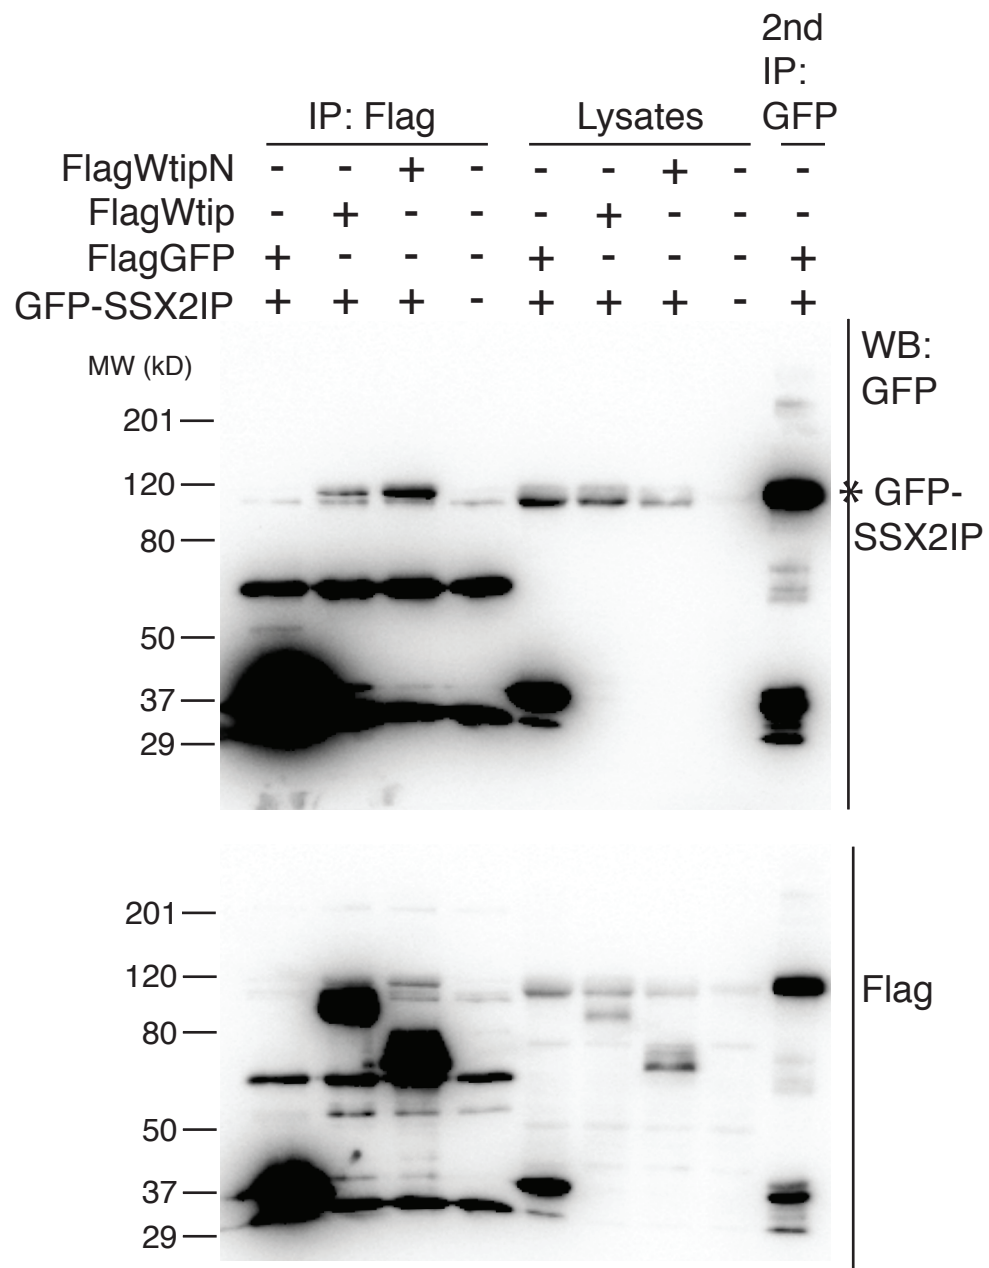

Supplement: pone.0259068.s002.pdf [file pone.0259068.s002.pdf]
